# Supplementary material
Source: Elsevier journal article supplement (https://www.sciencedirect.com/science/article/pii/S0300893221002530)
Supplement: mmc1 [file S0300893221002530:mmc1.pdf]

## SUPPLEMENTARY DATA

**Table 1 of the supplementary data – Causes of death**

| Patient ID     | Cause of death                     |
|----------------|------------------------------------|
| Patient No.5   | Cardiogenic shock                  |
| Patient No.7   | Stroke                             |
| Patient No.26  | Cardiogenic shock                  |
| Patient No.59  | Hemorrhagic shock                  |
| Patient No.62  | Multiple organ failure             |
| Patient No.101 | Hemorrhagic shock                  |
| Patient No.110 | Heart failure                      |
| Patient No.134 | Stroke                             |
| Patient No.139 | Heart failure                      |
| Patient No.189 | Stroke                             |
| Patient No.195 | Cardiogenic shock                  |
| Patient No.198 | Tamponade, ventricular perforation |
